# Supplementary material for: Functional Analysis of Host Factors that Mediate the Intracellular Lifestyle of Cryptococcus neoformans
Source: PubMed Central journal article supplement (PMC3116820; doi:10.1371/journal.ppat.1002078), 2011-06-16
Supplement: ppat.1002078.s009.pdf [file ppat.1002078.s009.pdf]

1 Table S1. *Cryptococcus neoformans* (Cn) strains used in this study

| Cn strains  | Genotype                        | Strain Characteristics                                                                                                                                                                                                       | References                        |
|-------------|---------------------------------|------------------------------------------------------------------------------------------------------------------------------------------------------------------------------------------------------------------------------|-----------------------------------|
| H99         | Wild type                       | Cn var. <i>grubii</i> , wild-type strain, highly virulent in mice                                                                                                                                                            | [1]                               |
| AI100-dsRed | P_histoneH3-DsRed-SKL-T_hH3-NEO | H99 with an ectopic integration of DsRed.                                                                                                                                                                                    | [2]                               |
| AI132-GFP   | P_histoneH3-HEM15-GFP-NAT       | H99 with an ectopic integration of GFP tagged after the <i>HEM15</i> protein.                                                                                                                                                | [2]                               |
| Cap59       | Cap59::HYG                      | Mutant in H99 background, avirulent, no capsule                                                                                                                                                                              | [3,4]                             |
| XX44        | Scs7::NEO                       | Mutant in H99 background, deletion of the gene encoding the sphingolipid alpha-hydroxylase. Virulence in animals not tested, but likely dramatically reduced as the mutant displays defective growth in 5% CO <sub>2</sub> . | Xie X and Lin X, unpublished data |
| HMC1        | lac1::HYG                       | Mutant in H99 background, modestly reduced in virulence, defective in melanin production                                                                                                                                     | [5,6,7]                           |
| MCD16       | lac1 mutant                     | Mutant in H99 background, modestly reduced in virulence, defective in melanin production                                                                                                                                     | [5,6,7]                           |
| AI81        | bwc1::NAT                       | Mutant in H99 background, modestly reduced in virulence, required for light sensing.                                                                                                                                         | [8]                               |
| XL1601      | Znf2::NEO                       | Mutant in H99 background, modestly enhanced in virulence. Cells are locked in yeast phase and cannot undergo dimorphic switch to hyphal growth during mating                                                                 | [9]                               |
| 87C         | Wild type                       | Cn var. <i>grubii</i>                                                                                                                                                                                                        | [10]                              |
| UA491       | Wild type                       | Cn var. <i>neoformans</i>                                                                                                                                                                                                    | [11]                              |
| UA4223      | Wild type                       | Cn var. <i>neoformans</i>                                                                                                                                                                                                    | [11]                              |
| UM2         | Wild type                       | Hybrid of Cn var. <i>grubii</i> and Cn var. <i>neoformans</i> (A/D strains)                                                                                                                                                  | [10]                              |

2

1 **References**

2

3 1. Perfect JR, Lang SD, Durack DT (1980) Chronic cryptococcal meningitis: a new experimental model in rabbits. *Am J Pathol* 101: 177-194.

4 2. Idnurm A, Giles SS, Perfect JR, Heitman J (2007) Peroxisome function regulates growth on glucose in the basidiomycete fungus *Cryptococcus*  
5 *neoformans*. *Eukaryot Cell* 6: 60-72.

6 3. Geunes-Boyer S, Oliver TN, Janbon G, Lodge JK, Heitman J, et al. (2009) Surfactant protein D increases phagocytosis of hypocapsular  
7 *Cryptococcus neoformans* by murine macrophages and enhances fungal survival. *Infect Immun* 77: 2783-2794.

8 4. Nelson RT, Pryor BA, Lodge JK (2003) Sequence length required for homologous recombination in *Cryptococcus neoformans*. *Fungal Genet*  
9 *Biol* 38: 1-9.

10 5. Pukkila-Worley R, Gerrald QD, Kraus PR, Boily MJ, Davis MJ, et al. (2005) Transcriptional network of multiple capsule and melanin genes  
11 governed by the *Cryptococcus neoformans* cyclic AMP cascade. *Eukaryot Cell* 4: 190-201.

12 6. Zhu X, Williamson PR (2004) Role of laccase in the biology and virulence of *Cryptococcus neoformans*. *FEMS Yeast Res* 5: 1-10.

13 7. Salas SD, Bennett JE, Kwon-Chung KJ, Perfect JR, Williamson PR (1996) Effect of the laccase gene CNLAC1, on virulence of *Cryptococcus*  
14 *neoformans*. *J Exp Med* 184: 377-386.

15 8. Idnurm A, Heitman J (2005) Light controls growth and development via a conserved pathway in the fungal kingdom. *PLoS Biol* 3: e95.

16 9. Lin X, Jackson JC, Feretzaki M, Xue C, Heitman J (2010) Transcription factors Mat2 and Znf2 operate cellular circuits orchestrating opposite-  
17 and same-sex mating in *Cryptococcus neoformans*. *PLoS Genet* 6: e1000953.

18 10. Chaturvedi V, Fan J, Stein B, Behr MJ, Samsonoff WA, et al. (2002) Molecular genetic analyses of mating pheromones reveal intervariety  
19 mating or hybridization in *Cryptococcus neoformans*. *Infect Immun* 70: 5225-5235.

20 11. Barchiesi F, Cogliati M, Esposito MC, Spreghini E, Schimizzi AM, et al. (2005) Comparative analysis of pathogenicity of *Cryptococcus*  
21 *neoformans* serotypes A, D and AD in murine cryptococcosis. *J Infect* 51: 10-16.

22

23
