# Supplementary material for: Functional Analysis of Host Factors that Mediate the Intracellular Lifestyle of Cryptococcus neoformans
Source: PubMed Central journal article supplement (PMC3116820; doi:10.1371/journal.ppat.1002078), 2011-06-16
Supplement: ppat.1002078.s010.pdf [file ppat.1002078.s010.pdf]

1 Table S2. Pharmacological compounds used in this study

| Drug Name              | Function                                                                                                                                                                             | Concentration | References |
|------------------------|--------------------------------------------------------------------------------------------------------------------------------------------------------------------------------------|---------------|------------|
| Cytochalasin D (CytD)  | Inhibitor of actin polymerization (disruption of actin microfilaments and activation of p53-dependent pathways which results in the arrest of the cell cycle at the G1-S transition) | 2.5 µg/ml     | [1]        |
| LY294002               | PI3 kinase inhibitor (blocks PI3 kinase-dependent Akt phosphorylation and kinase activity)                                                                                           | 30 µM         | [2]        |
| 3-Methyladenine (3-MA) | Autophagy Inhibitor; PI3 kinase inhibitor                                                                                                                                            | 10 mM         | [3]        |
| Bafilomycin A1 (BAF)   | Inhibitor of the vacuolar type H(+)-ATPase and endosomal acidification                                                                                                               | 100 nM        | [4]        |

2

3 **References**

4

5 1. Qin QM, Pei J, Ancona V, Shaw BD, Ficht TA, et al. (2008) RNAi screen of endoplasmic reticulum-associated host factors reveals a role for  
6 IRE1alpha in supporting Brucella replication. PLoS Pathog 4: e1000110.

7 2. Blommaert EF, Krause U, Schellens JP, Vreeling-Sindelarova H, Meijer AJ (1997) The phosphatidylinositol 3-kinase inhibitors wortmannin  
8 and LY294002 inhibit autophagy in isolated rat hepatocytes. Eur J Biochem 243: 240-246.

9 3. Petiot A, Ogier-Denis E, Blommaert EF, Meijer AJ, Codogno P (2000) Distinct classes of phosphatidylinositol 3'-kinases are involved in  
10 signaling pathways that control macroautophagy in HT-29 cells. J Biol Chem 275: 992-998.

11 4. Yamamoto A, Tagawa Y, Yoshimori T, Moriyama Y, Masaki R, et al. (1998) Bafilomycin A1 prevents maturation of autophagic vacuoles by  
12 inhibiting fusion between autophagosomes and lysosomes in rat hepatoma cell line, H-4-II-E cells. Cell Struct Funct 23: 33-42.

13

14
