# Supplementary material for: Functional Analysis of Host Factors that Mediate the Intracellular Lifestyle of Cryptococcus neoformans
Source: PubMed Central journal article supplement (PMC3116820; doi:10.1371/journal.ppat.1002078), 2011-06-16
Supplement: ppat.1002078.s011.pdf [file ppat.1002078.s011.pdf]

Table S3. Effect of host factor depletion on *Cryptococcus neoformans* infection

| Symbol          | CG #    | Function <sup>a</sup>                                                  | Relative infection index |      |           |      | Play role in regulation of the infection by other pathogens <sup>c</sup> | Human homolog |
|-----------------|---------|------------------------------------------------------------------------|--------------------------|------|-----------|------|--------------------------------------------------------------------------|---------------|
|                 |         |                                                                        | 3 h.p.i.                 |      | 24 h.p.i. |      |                                                                          |               |
|                 |         | <b>Reduced phagocytosis</b>                                            | RIF <sup>b</sup>         | SD   | RIF       | SD   |                                                                          |               |
| Rab11           | CG5771  | Small GTPase mediated signal transduction, regulation of transcription | 0.50                     | 0.18 | 0.63      | 0.19 | Cc <sup>c</sup> , Lm <sup>d</sup> , Mf <sup>e</sup>                      | RAB11A        |
| Rab23           | CG2108  | Small GTPase mediated signal transduction, protein transport           | 0.48                     | 0.24 | 0.77      | 0.01 |                                                                          | RAB23         |
| CG17565         | CG17565 | Rab-protein geranylgeranyltransferase complex                          | 0.50                     | 0.32 | 0.93      | 0.48 |                                                                          | FNTB          |
| Eip93F          | CG18389 | Phagocytosis, engulfment                                               | 0.43                     | 0.18 | 0.70      | 0.11 |                                                                          | ?             |
| Hr38            | CG1864  | Hormone receptor transcription factor                                  | 0.47                     | 0.19 | 0.80      | 0.29 | Ca <sup>f</sup>                                                          | NR4A2         |
| CG7033          | CG7033  | Vhaperonin-containing T-complex                                        | 0.45                     | 0.18 | 0.55      | 0.19 |                                                                          | CCT2          |
| CG2158          | CG2158  | Nuclear protein import/export                                          | 0.49                     | 0.18 | 0.57      | 0.16 | Ca                                                                       | NUP50         |
| TER94           | CG2331  | ER membrane fusion, microtubule cytoskeleton biogenesis                | 0.33                     | 0.14 | 1.30      | 1.29 | Ct <sup>g</sup> , Bm <sup>h</sup> , Lm, Mf                               | VCP           |
| lap             | CG2520  | Receptor-mediated endocytosis                                          | 0.49                     | 0.14 | 0.53      | 0.06 |                                                                          | PICALM        |
| Ost48           | CG9022  | Protein amino acid N-linked glycosylation                              | 0.46                     | 0.13 | 0.54      | 0.33 |                                                                          | DDOST         |
| exo84           | CG6095  | Vesicle-mediated transport, exocyst                                    | 0.30                     | 0.18 | 0.74      | 0.33 |                                                                          | EXOC8         |
| sec8            | CG2095  | Vesicle docking during exocytosis, exocyst                             | 0.29                     | 0.12 | 0.51      | 0.19 |                                                                          | EXOC4         |
| sec10           | CG6159  | Vesicle-mediated transport, exocytosis                                 | 0.33                     | 0.22 | 0.67      | 0.64 |                                                                          | EXOC5         |
| Vha14           | CG8210  | Vacuolar proton-transporting V-type ATPase,                            | 0.25                     | 0.26 | 0.82      | 1.37 |                                                                          | ATP6V1F       |
| $\alpha$ Tub84B | CG1913  | Microtubule-based movement, protein polymerization, GTPase activity    | 0.37                     | 0.04 | 0.58      | 0.35 | Lm, Mf                                                                   | TUBA1A        |
| $\delta$ COP    | CG14813 | COPI vesicles, endocytosis                                             | 0.23                     | 0.07 | 0.56      | 0.39 | Lm, Mf, Ca                                                               | ARCN1         |
|                 |         | <b>Reduced replication/escape</b>                                      |                          |      |           |      |                                                                          |               |
| CG14870         | CG14870 | Cilium assembly                                                        | 0.66                     | 0.46 | 0.37      | 0.20 |                                                                          | B9D1          |
| CG1126          | CG1126  | Cilium assembly                                                        | 0.64                     | 0.46 | 0.44      | 0.26 |                                                                          | BBS5          |
| Pk61C           | CG1210  | Plasma membrane, protein kinase activity, ATP binding                  | 0.68                     | 0.57 | 0.46      | 0.24 |                                                                          | PDPK1         |
| phl             | CG2845  | Protein kinase activity, amino acid phosphorylation                    | 0.52                     | 0.28 | 0.43      | 0.21 |                                                                          | BRAF          |
| Orct            | CG6331  | Apoptosis, organic cation transport                                    | 0.72                     | 0.22 | 0.42      | 0.09 |                                                                          | SLC22A13      |
| Aats-gly        | CG6778  | Glycyl-tRNA aminoacylation                                             | 0.68                     | 0.38 | 0.41      | 0.09 |                                                                          | GARS          |
| exo70           | CG7127  | Synaptic vesicle docking during exocytosis                             | 0.82                     | 0.47 | 0.48      | 0.14 |                                                                          | EXOC7         |
| Apc             | CG1451  | Microtubule associated complex                                         | 0.62                     | 0.21 | 0.44      | 0.25 |                                                                          | APC           |
| Myo31DF         | CG7438  | Actin binding; ATPase activity, myosin complex                         | 0.53                     | 0.56 | 0.35      | 0.27 | Ct                                                                       | MYO1D         |
| ERp60           | CG8983  | Protein folding; cell redox homeostasis                                | 0.85                     | 0.51 | 0.43      | 0.22 |                                                                          | PDIA3         |

|                                                         |         |                                                                        |      |      |      |      |                |          |
|---------------------------------------------------------|---------|------------------------------------------------------------------------|------|------|------|------|----------------|----------|
| Rac1                                                    | CG2248  | JNK cascade signaling, cytoskeletal rearrangements                     | 1.08 | 0.78 | 0.36 | 0.26 | Ct, Bm, Ca     | RAC2     |
| sec5                                                    | CG8843  | Neurotransmitter secretion; synaptic vesicle docking during exocytosis | 0.67 | 0.58 | 0.27 | 0.18 | Lm, Mf         | SEC5L1   |
| Crc                                                     | CG9429  | Calcium ion/unfolded protein binding,nervous system development        | 0.63 | 0.28 | 0.45 | 0.10 | Bm             | CALR     |
| Atg2                                                    | CG1241  | Autophagy                                                              | 0.51 | 0.43 | 0.50 | 0.07 |                | ATG2A    |
| Atg5                                                    | CG1643  | Autophagy                                                              | 0.58 | 0.08 | 0.43 | 0.03 |                | ATG5     |
| Atg9                                                    | CG3615  | Autophagy                                                              | 1.03 | 0.04 | 0.50 | 0.15 |                | ATG9A    |
| <b>Reduced both phagocytosis and replication/escape</b> |         |                                                                        |      |      |      |      |                |          |
| Rheb                                                    | CG1081  | Response to starvation, small GTPase mediated signal transduction      | 0.20 | 0.19 | 0.16 | 0.02 |                | RHEB     |
| Rab5                                                    | CG3664  | Early endosome; GTPase activity; GTP binding                           | 0.36 | 0.13 | 0.30 | 0.22 | Cc, Lm, Mf     | RAB5A    |
| Act42A                                                  | CG12051 | Actin, cytoskeleton                                                    | 0.29 | 0.18 | 0.11 | 0.11 | Mf, Ca         | ACTG1    |
| Act5C                                                   | CG4027  | Cytoskeleton organization, actin filament                              | 0.24 | 0.19 | 0.18 | 0.01 | Cc, Lm, Mf, Ca | ACTG1    |
| Act79B                                                  | CG7478  | Cytoskeleton organization, actin filament                              | 0.15 | 0.21 | 0.11 | 0.19 | Cc, Ct         | ACTG2    |
| Act88F                                                  | CG5178  | Cytoskeleton organization, actin filament                              | 0.20 | 0.12 | 0.22 | 0.09 | Ca             | ?        |
| βTub56D                                                 | CG9277  | Cytoskeleton; microtubule-based movement, protein polymerization       | 0.41 | 0.18 | 0.33 | 0.18 | Lm, Mf         | ?        |
| polo                                                    | CG12306 | Protein serine/threonine kinase activity, phosphorylates APC/C         | 0.35 | 0.16 | 0.35 | 0.34 | Ca             | PLK1     |
| CG5830                                                  | CG5830  | Phosphatase activity                                                   | 0.21 | 0.10 | 0.49 | 0.19 |                | CTDSP1   |
| Pi3K59F                                                 | CG5373  | phosphoinositide 3-kinase complex, class III                           | 0.51 | 0.35 | 0.47 | 0.22 | Bm             | PIK3C3   |
| dl                                                      | CG6667  | Regulation of transcription, Toll signaling pathway                    | 0.27 | 0.01 | 0.24 | 0.22 |                | REL      |
| ftz-f1                                                  | CG4059  | Salivary gland cell autophagic cell death, regulation of transcription | 0.31 | 0.06 | 0.31 | 0.37 |                | NR5A2    |
| CG6842                                                  | CG6842  | peptide deformylase, protein modification                              | 0.15 | 0.05 | 0.37 | 0.14 | Lm, Ca         | VPS4B    |
| th                                                      | CG12284 | Ubiquitin-protein ligase activity, anti-apoptosis                      | 0.10 | 0.10 | 0.32 | 0.38 | Cc, Mf         | ?        |
| CanA1                                                   | CG1455  | Vesicle-mediated transport; calcineurin complex,                       | 0.09 | 0.00 | 0.24 | 0.16 | Ct             | PPP3CA   |
| Gdi                                                     | CG4422  | Vesicle-mediated transport, Rab GDP-dissociation inhibitor activity    | 0.36 | 0.25 | 0.40 | 0.05 | Lm             | GDI2     |
| Vha13                                                   | CG6213  | Vacuolar proton-transporting V-type ATPase complex                     | 0.18 | 0.19 | 0.16 | 0.17 | Lm             | ATP6V1G1 |
| Vha44                                                   | CG8048  | Vacuolar proton-transporting V-type ATPase, V1 domain                  | 0.26 | 0.30 | 0.19 | 0.11 | Lm             | ATP6V1C1 |
| sec15                                                   | CG7034  | Vesicle-mediated transport, synaptic vesicle docking during exocytosis | 0.34 | 0.19 | 0.39 | 0.19 |                | EXOC6    |
| sec23                                                   | CG1250  | ER to Golgi transport vesicle, COPII vesicle coat                      | 0.24 | 0.07 | 0.33 | 0.16 | Bm, Lm, Mf     | SEC23A   |
| αCop                                                    | CG7961  | Vesicle-mediated transport, COPI vesicles coat                         | 0.21 | 0.10 | 0.08 | 0.03 | Cc, Lm, Mf, Ca | COPA     |
| ATPsyn-γ                                                | CG7610  | ATP synthesis coupled proton transport, ATPase                         | 0.43 | 0.20 | 0.32 | 0.11 | Ca             | ATP5C1   |
| MEK                                                     | CG15793 | MAPKKK cascade                                                         | 0.23 | 0.04 | 0.38 | 0.20 |                | MAP2K1   |
| Tsc1                                                    | CG6147  | Regulation of cell growth                                              | 0.46 | 0.28 | 0.22 | 0.07 | Cc             | TSC1     |
| <b>Enhanced replication/escape</b>                      |         |                                                                        |      |      |      |      |                |          |
| Hsp83                                                   | CG1242  | Response to stress, actin filament-based process                       | 1.99 | 1.02 | 4.22 | 2.12 |                | HSP90AA2 |

<sup>a</sup>Genes were categorized according to the Gene Ontology (GO) index, including GO molecular function, cellular component, or protein domains as reported in FlyBase (<http://flybase.org/>). <sup>b</sup>Relative infection index [RIF,  $RIF = \frac{\text{Infection index of dsRNA treatment}}{\text{Infection index of no dsRNA-treated control}}$ ]; where infection index = (CFU # recovered from Cn infected host cells)/(total host cell #) was determined as described in the *Materials and Methods*. *Drosophila* S2 cells were treated with dsRNAs for 4 days before *Cryptococcus neoformans* (AI100-dsRed or H99) infection. All data represent the means  $\pm$  standard deviations (SD) from at least three independent screens. The average RIF of the control that was not treated with RNAi was regarded as 1 (1.00 $\pm$ 0.249). dsRNAs that gave  $RIF \leq (1.00 - 2 \times SD, 0.50)$  or  $\geq (1.00 + 2 \times SD, 1.50)$  were regarded as hits. <sup>c</sup>*Cc*: *Chlamydia caviae* [1], <sup>d</sup>*Lm*: *Listeria monocytogenes* [2,3], <sup>e</sup>*Mf*: *Mycobacterium fortuitum* [2,4]. <sup>f</sup>*Ca*: *Candida albicans* [5]. <sup>g</sup>*Ct*: *Chlamydia trachomatis* [6]. <sup>h</sup>*Bm*: *Brucella melitensis* [7].

## References

1. Derre I, Pypaert M, Dautry-Varsat A, Agaisse H (2007) RNAi screen in *Drosophila* cells reveals the involvement of the Tom complex in Chlamydia infection. PLoS Pathog 3: 1446-1458.
2. Agaisse H, Burrack LS, Philips JA, Rubin EJ, Perrimon N, et al. (2005) Genome-wide RNAi screen for host factors required for intracellular bacterial infection. Science 309: 1248-1251.
3. Cheng LW, Viala JP, Stuurman N, Wiedemann U, Vale RD, et al. (2005) Use of RNA interference in *Drosophila* S2 cells to identify host pathways controlling compartmentalization of an intracellular pathogen. Proc Natl Acad Sci U S A 102: 13646-13651.
4. Philips JA, Rubin EJ, Perrimon N (2005) *Drosophila* RNAi screen reveals CD36 family member required for mycobacterial infection. Science 309: 1251-1253.
5. Stroschein-Stevenson SL, Foley E, O'Farrell PH, Johnson AD (2006) Identification of *Drosophila* gene products required for phagocytosis of *Candida albicans*. PLoS Biol 4: e4.
6. Elwell CA, Ceesay A, Kim JH, Kalman D, Engel JN (2008) RNA interference screen identifies Abl kinase and PDGFR signaling in *Chlamydia trachomatis* entry. PLoS Pathog 4: e1000021.
7. Qin QM, Pei J, Ancona V, Shaw BD, Ficht TA, et al. (2008) RNAi screen of endoplasmic reticulum-associated host factors reveals a role for IRE1alpha in supporting *Brucella* replication. PLoS Pathog 4: e1000110.
