# Supplementary material for: Functional Analysis of Host Factors that Mediate the Intracellular Lifestyle of Cryptococcus neoformans
Source: PubMed Central journal article supplement (PMC3116820; doi:10.1371/journal.ppat.1002078), 2011-06-16
Supplement: ppat.1002078.s013.pdf [file ppat.1002078.s013.pdf]

**Supplemental Video 2:** Late stages of Cn infection of *Drosophila* S2 cells

<http://www.youtube.com/user/deFigueiredoLab?blend=1&ob=5#p/u/0/9XdxN40MApE>
